# Supplementary material for: Foliar Fungal Endophytes in a Tree Diversity Experiment Are Driven by the Identity but Not the Diversity of Tree Species
Source: MDPI journal article supplement (doi:10.3390/life11101081), 2021-10-13
Supplement: s1 [file s1]

|         |               |                                    |                                    |                               |                 |                              |      |      |      |
|---------|---------------|------------------------------------|------------------------------------|-------------------------------|-----------------|------------------------------|------|------|------|
| OTU_025 | Ascomycota    | Eurotiomycetes                     | Eurotiales                         | Aspergillaceae                | Penicillium     | Penicillium_thymicola        | TRUE | TRUE | TRUE |
| OTU_026 | Basidiomycota | Exobasidiomycetes                  | Entylomatales                      | unidentified                  | unidentified    | unidentified                 | TRUE | TRUE | TRUE |
| OTU_027 | Ascomycota    | Saccharomycetes                    | Saccharomycetales                  | Metschnikowiaceae             | Metschnikowia   | Metschnikowia_viticola       | TRUE | TRUE | TRUE |
| OTU_028 | Basidiomycota | Agaricomycetes                     | Russulales                         | Russulaceae                   | Russula         | Russula_cyanoxantha          | TRUE | TRUE | TRUE |
| OTU_029 | Basidiomycota | Microbotryomycetes                 | Sporidiobolales                    | Sporidiobolaceae              | Sporobolomyces  | Sporobolomyces_roseus        | TRUE | TRUE | TRUE |
| OTU_030 | Basidiomycota | Agaricomycetes                     | Atheliales                         | Atheliaceae                   | Tylospora       | unidentified                 |      | TRUE |      |
| OTU_031 | Basidiomycota | Microbotryomycetes                 | Sporidiobolales                    | Sporidiobolaceae              | Rhodotorula     | Rhodotorula_diobovata        | TRUE | TRUE | TRUE |
| OTU_032 | Ascomycota    | Leotiomycetes                      | Helotiales                         | Helotiales_fam_Incertae_sedis | Chalara         | unidentified                 | TRUE | TRUE | TRUE |
| OTU_033 | unidentified  | unidentified                       | unidentified                       | unidentified                  | unidentified    | unidentified                 | TRUE | TRUE | TRUE |
| OTU_034 | Ascomycota    | Leotiomycetes                      | Helotiales                         | Helotiaceae                   | Hymenoscyphus   | Hymenoscyphus_caudatus       | TRUE | TRUE | TRUE |
| OTU_035 | Ascomycota    | Dothideomycetes                    | Dothideomycetes_ord_Incertae_sedis | Nowamyetaceae                 | Nowamyces       | Nowamyces_globulus           | TRUE | TRUE | TRUE |
| OTU_036 | Basidiomycota | Tremellomycetes                    | Tremellales                        | unidentified                  | unidentified    | unidentified                 |      | TRUE | TRUE |
| OTU_037 | Basidiomycota | Tremellomycetes                    | Tremellales                        | Bulleribasidiaceae            | Vishniacozyma   | Vishniacozyma_victoriae      | TRUE | TRUE | TRUE |
| OTU_038 | Basidiomycota | Tremellomycetes                    | Tremellales                        | Bulleribasidiaceae            | Vishniacozyma   | unidentified                 | TRUE | TRUE | TRUE |
| OTU_039 | Ascomycota    | Dothideomycetes                    | Capnodiales                        | Mycosphaerellaceae            | Mycosphaerella  | Mycosphaerella_flageoletiana | TRUE | TRUE | TRUE |
| OTU_040 | Basidiomycota | Ustilaginomycetes                  | Ustilaginales                      | Ustilaginaceae                | Pseudozyma      | Pseudozyma_prolifera         | TRUE | TRUE | TRUE |
| OTU_041 | Ascomycota    | Dothideomycetes                    | Capnodiales                        | Cladosporiaceae               | Cladosporium    | Cladosporium_delicatulum     | TRUE | TRUE | TRUE |
| OTU_042 | Ascomycota    | Leotiomycetes                      | Helotiales                         | Hyaloscyphaceae               | Austropezia     | unidentified                 | TRUE | TRUE | TRUE |
| OTU_043 | Ascomycota    | Dothideomycetes                    | Capnodiales                        | unidentified                  | unidentified    | unidentified                 | TRUE | TRUE | TRUE |
| OTU_044 | Basidiomycota | Agaricomycetes                     | Agaricales                         | Clavariaceae                  | Clavaria        | unidentified                 | TRUE | TRUE | TRUE |
| OTU_045 | Basidiomycota | Malasseziomycetes                  | Malasseziales                      | Malasseziaceae                | Malassezia      | Malassezia_globosa           | TRUE | TRUE | TRUE |
| OTU_046 | Ascomycota    | unidentified                       | unidentified                       | unidentified                  | unidentified    | unidentified                 | TRUE | TRUE |      |
| OTU_047 | Basidiomycota | Agaricomycetes                     | Agaricales                         | Hygrophoraceae                | Cuphophyllus    | Cuphophyllus_pratensis       | TRUE | TRUE | TRUE |
| OTU_048 | Ascomycota    | Sordariomycetes                    | Pleurotheciales                    | Pleurotheciaceae              | Phaeoisaria     | Phaeoisaria_loranthacearum   |      | TRUE |      |
| OTU_049 | Ascomycota    | Leotiomycetes                      | Helotiales                         | Leotiaceae                    | unidentified    | unidentified                 |      | TRUE | TRUE |
| OTU_050 | Basidiomycota | Cystobasidiomycetes                | Erythrobasidiales                  | Erythrobasidiaceae            | Erythrobasidium | Erythrobasidium_yunnanense   | TRUE |      |      |
| OTU_051 | Rozellomycota | Rozellomycotina_cls_Incertae_sedis | GS11                               | unidentified                  | unidentified    | unidentified                 |      |      | TRUE |
| OTU_052 | Ascomycota    | Leotiomycetes                      | Erysiphales                        | Erysiphaceae                  | Podosphaera     | Podosphaera_leucotricha      | TRUE | TRUE | TRUE |

|         |               |                    |                     |                      |                   |                              |      |      |      |
|---------|---------------|--------------------|---------------------|----------------------|-------------------|------------------------------|------|------|------|
| OTU_053 | unidentified  | unidentified       | unidentified        | unidentified         | unidentified      | unidentified                 | TRUE | TRUE | TRUE |
| OTU_054 | Basidiomycota | Agaricomycetes     | Agaricales          | Tricholomataceae     | Tricholoma        | Tricholoma_umbonatum         | TRUE |      |      |
| OTU_055 | Ascomycota    | Dothideomycetes    | Capnodiales         | Mycosphaerellaceae   | Pallidocercospora | Pallidocercospora_heimii     | TRUE | TRUE | TRUE |
| OTU_056 | Basidiomycota | Agaricomycetes     | Agaricales          | Hygrophoraceae       | Hygrophorus       | Hygrophorus_eburneus         | TRUE | TRUE |      |
| OTU_057 | NA            | NA                 | NA                  | NA                   | NA                | No blast hit                 | TRUE | TRUE |      |
| OTU_058 | Basidiomycota | Tremellomycetes    | Cystofilobasidiales | Cystofilobasidiaceae | Cystofilobasidium | Cystofilobasidium_ferigula   | TRUE | TRUE | TRUE |
| OTU_059 | Ascomycota    | Dothideomycetes    | Capnodiales         | Mycosphaerellaceae   | Mycosphaerella    | Mycosphaerella_flageoletiana |      |      | TRUE |
| OTU_060 | Ascomycota    | Dothideomycetes    | Capnodiales         | Teratosphaeriaceae   | Devriesia         | Devriesia_pseudoamericana    |      |      | TRUE |
| OTU_061 | Ascomycota    | Leotiomycetes      | Helotiales          | unidentified         | unidentified      | unidentified                 | TRUE |      | TRUE |
| OTU_062 | Basidiomycota | Tremellomycetes    | Filobasidiales      | Filobasidiaceae      | Filobasidium      | Filobasidium_wieringae       | TRUE | TRUE | TRUE |
| OTU_063 | Basidiomycota | Agaricomycetes     | Agaricales          | Hygrophoraceae       | Cuphophyllus      | Cuphophyllus_pratensis       | TRUE | TRUE | TRUE |
| OTU_064 | Basidiomycota | Tremellomycetes    | Filobasidiales      | Filobasidiaceae      | Naganishia        | Naganishia_diffluens         | TRUE | TRUE | TRUE |
| OTU_065 | Ascomycota    | Dothideomycetes    | Pleosporales        | Sporormiaceae        | Preussia          | unidentified                 | TRUE |      |      |
| OTU_066 | Ascomycota    | Dothideomycetes    | Pleosporales        | Didymellaceae        | Didymella         | Didymella_rhei               | TRUE | TRUE | TRUE |
| OTU_067 | Ascomycota    | Pezizomycetes      | Pezizales           | Pezizaceae           | Hydnobolites      | Hydnobolites_cerebriformis   |      |      | TRUE |
| OTU_068 | unidentified  | unidentified       | unidentified        | unidentified         | unidentified      | unidentified                 | TRUE |      |      |
| OTU_069 | Ascomycota    | Saccharomycetes    | Saccharomycetales   | Saccharomycetaceae   | Issatchenkia      | Issatchenkia_orientalis      | TRUE | TRUE | TRUE |
| OTU_070 | Basidiomycota | Agaricomycetes     | Trechisporales      | Hydnodontaceae       | unidentified      | unidentified                 | TRUE |      |      |
| OTU_071 | NA            | NA                 | NA                  | NA                   | NA                | No blast hit                 | TRUE | TRUE |      |
| OTU_072 | Ascomycota    | unidentified       | unidentified        | unidentified         | unidentified      | unidentified                 | TRUE |      |      |
| OTU_073 | Ascomycota    | Dothideomycetes    | Capnodiales         | Mycosphaerellaceae   | unidentified      | unidentified                 |      |      | TRUE |
| OTU_074 | Ascomycota    | Dothideomycetes    | Pleosporales        | Pleosporaceae        | Alternaria        | Alternaria_tenuissima        | TRUE | TRUE |      |
| OTU_075 | Ascomycota    | Leotiomycetes      | Helotiales          | Sclerotiniaceae      | Botrytis          | Botrytis_caroliniana         |      | TRUE |      |
| OTU_076 | Basidiomycota | Agaricomycetes     | Agaricales          | Inocybaceae          | Inocybe           | Inocybe_assimilata           |      | TRUE |      |
| OTU_077 | Ascomycota    | Saccharomycetes    | Saccharomycetales   | Saccharomycodaceae   | Hanseniaspora     | Hanseniaspora_uvarum         | TRUE | TRUE | TRUE |
| OTU_078 | Ascomycota    | Sordariomycetes    | Sordariales         | unidentified         | unidentified      | unidentified                 | TRUE | TRUE |      |
| OTU_079 | Basidiomycota | Microbotryomycetes | Microbotryales      | Microbotryaceae      | Microbotryum      | Microbotryum_stellariae      | TRUE | TRUE | TRUE |
| OTU_080 | Ascomycota    | Eurotiomycetes     | Chaetothyriales     | Herpotrichiellaceae  | unidentified      | unidentified                 |      |      | TRUE |
| OTU_081 | Basidiomycota | Tremellomycetes    | unidentified        | unidentified         | unidentified      | unidentified                 |      | TRUE |      |

|         |                   |                                    |                                          |                    |                  |                          |      |      |      |
|---------|-------------------|------------------------------------|------------------------------------------|--------------------|------------------|--------------------------|------|------|------|
| OTU_082 | Ascomycota        | Dothideomycetes                    | Pleosporales                             | unidentified       | unidentified     | unidentified             | TRUE |      |      |
| OTU_083 | Ascomycota        | Leotiomycetes                      | Helotiales                               | Hyaloscyphaceae    | unidentified     | unidentified             | TRUE |      |      |
| OTU_084 | Ascomycota        | Dothideomycetes                    | Capnodiales                              | unidentified       | unidentified     | unidentified             | TRUE |      |      |
| OTU_086 | Ascomycota        | Saccharomycetes                    | Saccharomycetales                        | Dipodascaceae      | unidentified     | unidentified             |      | TRUE |      |
| OTU_087 | Basidiomycota     | Agaricomycetes                     | Thelephorales                            | Thelephoraceae     | Tomentella       | unidentified             | TRUE |      |      |
| OTU_088 | Basidiomycota     | Tremellomycetes                    | Filobasidiales                           | Piskurozymaceae    | Solicoccozyma    | Solicoccozyma_terricola  | TRUE | TRUE | TRUE |
| OTU_089 | Basidiomycota     | Exobasidiomycetes                  | Exobasidiales                            | Graphiolaceae      | Graphiola        | Graphiola_phoenicis      | TRUE | TRUE | TRUE |
| OTU_090 | Ascomycota        | Dothideomycetes                    | Pleosporales                             | Amorosiaceae       | Angustimassarina | Angustimassarina_acerina |      |      | TRUE |
| OTU_091 | Rozellomycota     | Rozellomycotina_cls_Incertae_sedis | GS11                                     | unidentified       | unidentified     | unidentified             |      | TRUE |      |
| OTU_092 | unidentified      | unidentified                       | unidentified                             | unidentified       | unidentified     | unidentified             |      | TRUE |      |
| OTU_093 | Ascomycota        | Leotiomycetes                      | Helotiales                               | unidentified       | unidentified     | unidentified             | TRUE | TRUE | TRUE |
| OTU_094 | Basidiomycota     | Cystobasidiomycetes                | Cystobasidiomycetes_order_Incertae_sedis | Symmetrosporaceae  | Symmetrospora    | unidentified             | TRUE | TRUE | TRUE |
| OTU_095 | Ascomycota        | Dothideomycetes                    | Pleosporales                             | Didymellaceae      | Neoascochyta     | Neoascochyta_graminicola | TRUE | TRUE | TRUE |
| OTU_096 | Ascomycota        | Dothideomycetes                    | Pleosporales                             | Phaeosphaeriaceae  | Setomelanomma    | Setomelanomma_holmii     |      |      | TRUE |
| OTU_097 | Ascomycota        | Dothideomycetes                    | Pleosporales                             | Phaeosphaeriaceae  | Septoriella      | Septoriella_phragmitis   | TRUE |      |      |
| OTU_098 | Basidiomycota     | Agaricomycetes                     | Thelephorales                            | Thelephoraceae     | Tomentella       | Tomentella_ellisii       | TRUE |      |      |
| OTU_100 | Mortierellomycota | Mortierellomycetes                 | Mortierellales                           | Mortierellaceae    | Mortierella      | unidentified             | TRUE |      |      |
| OTU_101 | Basidiomycota     | Agaricomycetes                     | Russulales                               | Russulaceae        | Russula          | Russula_grisea           |      | TRUE |      |
| OTU_102 | Ascomycota        | Leotiomycetes                      | Helotiales                               | unidentified       | unidentified     | unidentified             | TRUE | TRUE | TRUE |
| OTU_103 | Ascomycota        | Dothideomycetes                    | Capnodiales                              | Neodevriesiaceae   | Neodevriesia     | Neodevriesia_sexualis    | TRUE |      | TRUE |
| OTU_104 | NA                | NA                                 | NA                                       | NA                 | NA               | No blast hit             |      | TRUE |      |
| OTU_105 | Mortierellomycota | Mortierellomycetes                 | Mortierellales                           | Mortierellaceae    | Mortierella      | Mortierella_longigemmata |      |      | TRUE |
| OTU_107 | Basidiomycota     | Tritirachiomycetes                 | Tritirachiales                           | Tritirachiaceae    | Paratritirachium | unidentified             | TRUE |      |      |
| OTU_108 | Ascomycota        | Sordariomycetes                    | Chaetosphaeriales                        | Chaetosphaeriaceae | Chaetosphaeria   | unidentified             | TRUE |      |      |
| OTU_110 | Basidiomycota     | Malasseziomycetes                  | Malasseziales                            | Malasseziaceae     | Malassezia       | Malassezia_globosa       | TRUE | TRUE | TRUE |
| OTU_111 | Ascomycota        | Leotiomycetes                      | Helotiales                               | unidentified       | unidentified     | unidentified             |      |      | TRUE |
| OTU_112 | Ascomycota        | Sordariomycetes                    | Xylariales                               | Xylariaceae        | Nemania          | Nemania_sp               |      |      | TRUE |
| OTU_114 | Basidiomycota     | Tremellomycetes                    | Tremellales                              | Bulleraceae        | Bullera          | Bullera_crocea           | TRUE | TRUE | TRUE |

|         |               |                                        |                                            |                    |                                      |                                                         |      |      |
|---------|---------------|----------------------------------------|--------------------------------------------|--------------------|--------------------------------------|---------------------------------------------------------|------|------|
| OTU_115 | Ascomycota    | Sordariomycetes                        | Hypocreales                                | Clavicipitaceae    | Metarhizium                          | Metarhizium_anisopliae                                  |      | TRUE |
| OTU_116 | Ascomycota    | Dothideomycetes                        | Pleosporales                               | Didymellaceae      | Epicoccum                            | Epicoccum_dendrobii                                     | TRUE | TRUE |
| OTU_117 | Ascomycota    | Eurotiomycetes                         | Eurotiales                                 | Aspergillaceae     | Penicillium                          | Penicillium_salamorum                                   | TRUE | TRUE |
| OTU_118 | Ascomycota    | Dothideomycetes                        | Dothideales                                | Aureobasidiaceae   | Kabatiella                           | Kabatiella_lini                                         | TRUE | TRUE |
| OTU_119 | Ascomycota    | Dothideomycetes                        | Pleosporales                               | Leptosphaeriaceae  | Leptosphaeria                        | Leptosphaeria_rubefaciens                               | TRUE | TRUE |
| OTU_120 | Ascomycota    | Saccharomycetes                        | Saccharomycetales                          | Saccharomycetaceae | Torulaspora                          | Torulaspora_delbrueckii                                 | TRUE | TRUE |
| OTU_121 | Basidiomycota | Malasseziomycetes                      | Malasseziales                              | Malasseziaceae     | Malassezia                           | Malassezia_globosa                                      | TRUE | TRUE |
| OTU_122 | Ascomycota    | Saccharomycetes                        | Saccharomycetales                          | Dipodascaceae      | unidentified                         | unidentified                                            | TRUE | TRUE |
| OTU_123 | Ascomycota    | Leotiomycetes                          | Helotiales                                 | Myxotrichaceae     | Oidiodendron                         | Oidiodendron_rhodogenum                                 | TRUE |      |
| OTU_124 | Ascomycota    | unidentified                           | unidentified                               | unidentified       | unidentified                         | unidentified                                            | TRUE | TRUE |
| OTU_125 | Ascomycota    | Dothideomycetes                        | Venturiales                                | Venturiaceae       | unidentified                         | unidentified                                            |      | TRUE |
| OTU_126 | Ascomycota    | Eurotiomycetes                         | Eurotiales                                 | Aspergillaceae     | Penicillium                          | Penicillium_penicillioides                              | TRUE |      |
| OTU_127 | Basidiomycota | Tremellomycetes                        | Tremellales                                | Bulleribasidiaceae | Dioszegia                            | Dioszegia_hungarica                                     | TRUE | TRUE |
| OTU_128 | Basidiomycota | Cystobasidiomycetes                    | Cystobasidiomycetes_ord<br>_Incertae_sedis | Symmetrosporaceae  | Symmetrospora                        | unidentified                                            | TRUE | TRUE |
| OTU_129 | Ascomycota    | Sordariomycetes                        | Sordariales                                | Lasiosphaeriaceae  | Apodus<br>Phaeophleospo<br>a         | Apodus_deciduus                                         |      | TRUE |
| OTU_130 | Ascomycota    | Dothideomycetes                        | Capnodiales                                | Mycosphaerellaceae |                                      | Phaeophleospora_stramenti                               |      | TRUE |
| OTU_131 | Rozellomycota | Rozellomycotina_cls_In<br>certae_sedis | GS11                                       | unidentified       | unidentified                         | unidentified<br>Cladosporium_sphaerosper<br>mum         |      | TRUE |
| OTU_132 | Ascomycota    | Dothideomycetes                        | Capnodiales                                | Cladosporiaceae    | Cladosporium                         |                                                         | TRUE |      |
| OTU_133 | Ascomycota    | Sordariomycetes                        | Microascales                               | Microascaceae      | Cephalotrichum                       | unidentified                                            | TRUE |      |
| OTU_134 | Basidiomycota | Tremellomycetes                        | Tremellales                                | Bulleribasidiaceae | Vishniacozyma<br>Wickerhamomyc<br>es | Vishniacozyma_victoriae<br>Wickerhamomyces_anomalu<br>s |      | TRUE |
| OTU_135 | Ascomycota    | Saccharomycetes                        | Saccharomycetales                          | Phaffomycetaceae   |                                      |                                                         | TRUE |      |
| OTU_136 | Ascomycota    | Leotiomycetes                          | Rhytismatales                              | Rhytismataceae     | Lophodermium                         | unidentified                                            |      | TRUE |
| OTU_137 | Basidiomycota | Agaricomycetes                         | Boletales                                  | Melanogastraceae   | Melanogaster                         | Melanogaster_broomeanus                                 | TRUE |      |
| OTU_138 | Ascomycota    | Lecanoromycetes                        | Teloschistales                             | Teloschistaceae    | Xanthoria                            | Xanthoria_coomae                                        |      | TRUE |
| OTU_139 | Basidiomycota | Tremellomycetes                        | Tremellales                                | Syzygosporaceae    | Syzygospora                          | Syzygospora_effibulata                                  |      | TRUE |
| OTU_140 | Basidiomycota | Agaricomycetes                         | Russulales                                 | Russulaceae        | Russula                              | Russula_puellaris                                       |      | TRUE |
| OTU_142 | Basidiomycota | Tremellomycetes                        | Trichosporonales                           | Trichosporonaceae  | Apiotrichum                          | Apiotrichum_porosum                                     |      | TRUE |
| OTU_143 | Ascomycota    | Dothideomycetes                        | Capnodiales                                | Dissoconiaceae     | Uwebraunia                           | Uwebraunia_dekkeri                                      | TRUE | TRUE |

|         |                   |                    |                   |                       |                 |                            |      |      |      |
|---------|-------------------|--------------------|-------------------|-----------------------|-----------------|----------------------------|------|------|------|
| OTU_145 | NA                | NA                 | NA                | NA                    | NA              | No blast hit               |      | TRUE | TRUE |
| OTU_146 | Basidiomycota     | Tremellomycetes    | Tremellales       | Bulleribasidiaceae    | Vishniacozyma   | Vishniacozyma_carnescens   | TRUE | TRUE |      |
| OTU_147 | Mucoromycota      | Mucoromycetes      | Mucorales         | Mucoraceae            | Mucor           | Mucor_bainieri             | TRUE |      | TRUE |
| OTU_148 | unidentified      | unidentified       | unidentified      | unidentified          | unidentified    | unidentified               | TRUE | TRUE |      |
| OTU_149 | Ascomycota        | Leotiomycetes      | Thelebolales      | Pseudeurotiaceae      | Leuconeurospora | unidentified               |      | TRUE |      |
| OTU_150 | Ascomycota        | unidentified       | unidentified      | unidentified          | unidentified    | unidentified               |      |      | TRUE |
| OTU_151 | Ascomycota        | Sordariomycetes    | Sordariales       | Lasiosphaeriaceae     | unidentified    | unidentified               | TRUE | TRUE |      |
| OTU_152 | Ascomycota        | Dothideomycetes    | Dothideales       | Dothioraceae          | Hormonema       | unidentified               | TRUE |      |      |
| OTU_153 | Mortierellomycota | Mortierellomycetes | Mortierellales    | Mortierellaceae       | Mortierella     | Mortierella_macrocytis     |      | TRUE | TRUE |
| OTU_154 | Ascomycota        | Saccharomycetes    | Saccharomycetales | Saccharomycetaceae    | Kluyveromyces   | Kluyveromyces_lactis       |      |      | TRUE |
| OTU_155 | Ascomycota        | Dothideomycetes    | Capnodiales       | Mycosphaerellaceae    | unidentified    | unidentified               |      |      | TRUE |
| OTU_158 | Ascomycota        | Sordariomycetes    | Hypocreales       | Hypocreaceae          | Trichoderma     | Trichoderma_aureoviride    |      | TRUE |      |
| OTU_159 | Basidiomycota     | Tremellomycetes    | Tremellales       | Rhynchogastremataceae | Papiliotrema    | Papiliotrema_japonica      | TRUE |      | TRUE |
| OTU_160 | Basidiomycota     | Tremellomycetes    | Tremellales       | Bulleribasidiaceae    | Hannaella       | Hannaella_kunmingensis     | TRUE |      |      |
| OTU_161 | Basidiomycota     | Tremellomycetes    | Tremellales       | unidentified          | unidentified    | unidentified               | TRUE |      | TRUE |
| OTU_162 | Ascomycota        | Dothideomycetes    | unidentified      | unidentified          | unidentified    | unidentified               | TRUE |      | TRUE |
| OTU_163 | Ascomycota        | Dothideomycetes    | Capnodiales       | unidentified          | unidentified    | unidentified               |      |      | TRUE |
| OTU_164 | Ascomycota        | Eurotiomycetes     | Eurotiales        | Aspergillaceae        | Penicillium     | Penicillium_bilaiae        |      |      | TRUE |
| OTU_165 | Mortierellomycota | Mortierellomycetes | Mortierellales    | Mortierellaceae       | Mortierella     | Mortierella_basiparvispora |      |      | TRUE |
| OTU_166 | Ascomycota        | Leotiomycetes      | Thelebolales      | Pseudeurotiaceae      | unidentified    | unidentified               | TRUE |      |      |
| OTU_167 | Ascomycota        | Lichinomycetes     | Lichinales        | Lichinaceae           | Phylliscum      | Phylliscum_demangeonii     |      | TRUE |      |
| OTU_168 | Basidiomycota     | Agaricomycetes     | unidentified      | unidentified          | unidentified    | unidentified               |      | TRUE |      |
| OTU_169 | Ascomycota        | Saccharomycetes    | Saccharomycetales | Metschnikowiaceae     | Clavispora      | unidentified               | TRUE | TRUE | TRUE |
| OTU_170 | Basidiomycota     | Microbotryomycetes | Sporidiobolales   | Sporidiobolaceae      | Sporobolomyces  | Sporobolomyces_oryzicola   | TRUE | TRUE | TRUE |
| OTU_172 | Basidiomycota     | Malasseziomycetes  | Malasseziales     | Malasseziaceae        | Malassezia      | Malassezia_globosa         | TRUE | TRUE |      |
| OTU_173 | Ascomycota        | Sordariomycetes    | Coniochaetales    | Coniochaetaceae       | Coniochaeta     | Coniochaeta_lignicola      | TRUE | TRUE | TRUE |
| OTU_174 | Basidiomycota     | Tremellomycetes    | Filobasidiales    | Filobasidiaceae       | Filobasidium    | Filobasidium_stepposum     | TRUE |      |      |
| OTU_175 | Basidiomycota     | Malasseziomycetes  | Malasseziales     | Malasseziaceae        | Malassezia      | Malassezia_arunalokei      | TRUE |      | TRUE |
| OTU_176 | Basidiomycota     | Agaricomycetes     | Russulales        | Russulaceae           | Russula         | Russula_nigricans          |      |      | TRUE |

|         |                   |                     |                   |                                      |                 |                            |      |      |
|---------|-------------------|---------------------|-------------------|--------------------------------------|-----------------|----------------------------|------|------|
| OTU_177 | unidentified      | unidentified        | unidentified      | unidentified                         | unidentified    | unidentified               |      | TRUE |
| OTU_178 | Basidiomycota     | Agaricomycetes      | Sebacinales       | Sebacinaceae                         | Sebacina        | unidentified               |      | TRUE |
| OTU_179 | Ascomycota        | Leotiomycetes       | Helotiales        | unidentified                         | unidentified    | unidentified               | TRUE |      |
| OTU_180 | Ascomycota        | Sordariomycetes     | Hypocreales       | Nectriaceae                          | unidentified    | unidentified               | TRUE |      |
| OTU_181 | Mortierellomycota | Mortierellomycetes  | Mortierellales    | Mortierellaceae                      | Mortierella     | Mortierella_horticola      | TRUE |      |
| OTU_182 | Rozellomycota     | unidentified        | unidentified      | unidentified                         | unidentified    | unidentified               | TRUE |      |
| OTU_183 | Ascomycota        | Saccharomycetes     | Saccharomycetales | Phaffomycetaceae                     | Wickerhamomyces | Wickerhamomyces_anomalus   |      | TRUE |
| OTU_185 | Basidiomycota     | Agaricomycetes      | Agaricales        | Hygrophoraceae                       | Hygrophorus     | Hygrophorus_discoxanthus   |      | TRUE |
| OTU_186 | NA                | NA                  | NA                | NA                                   | NA              | No blast hit               |      | TRUE |
| OTU_187 | Basidiomycota     | Agaricomycetes      | Agaricales        | Amanitaceae                          | Amanita         | Amanita_submembranacea     | TRUE |      |
| OTU_188 | Ascomycota        | Eurotiomycetes      | Eurotiales        | Aspergillaceae                       | Penicillium     | Penicillium_jensenii       | TRUE |      |
| OTU_190 | Ascomycota        | Saccharomycetes     | Saccharomycetales | Saccharomycetales_fam_Incertae_sedis | Candida         | Candida_vrieseae           |      | TRUE |
| OTU_191 | Ascomycota        | Dothideomycetes     | Dothideales       | Dothioraceae                         | Dothiora        | Dothiora_prunorum          |      | TRUE |
| OTU_192 | Basidiomycota     | Agaricomycetes      | Russulales        | Russulaceae                          | Russula         | unidentified               | TRUE | TRUE |
| OTU_193 | unidentified      | unidentified        | unidentified      | unidentified                         | unidentified    | unidentified               | TRUE |      |
| OTU_194 | Ascomycota        | Dothideomycetes     | Pleosporales      | Phaeosphaeriaceae                    | Setomelanomma   | Setomelanomma_holmii       | TRUE |      |
| OTU_195 | Ascomycota        | Dothideomycetes     | Pleosporales      | Phaeosphaeriaceae                    | Setomelanomma   | unidentified               |      | TRUE |
| OTU_196 | Basidiomycota     | Agaricomycetes      | Corticiales       | Vuilleminiaceae                      | Vuilleminia     | Vuilleminia_comedens       | TRUE |      |
| OTU_197 | Basidiomycota     | Ustilaginomycetes   | Ustilaginales     | Ustilaginaceae                       | Macalpinomyces  | Macalpinomyces_tristachyae | TRUE | TRUE |
| OTU_198 | Ascomycota        | Dothideomycetes     | Dothideales       | Aureobasidiaceae                     | Aureobasidium   | Aureobasidium_thailandense | TRUE |      |
| OTU_199 | Ascomycota        | Dothideomycetes     | Pleosporales      | unidentified                         | unidentified    | unidentified               | TRUE |      |
| OTU_201 | Basidiomycota     | Agaricomycetes      | Russulales        | Russulaceae                          | Russula         | unidentified               | TRUE |      |
| OTU_202 | Basidiomycota     | Cystobasidiomycetes | Erythrobasidiales | Erythrobasidiales_fam_Incertae_sedis | Sakaguchia      | Sakaguchia_dacryoidea      | TRUE |      |
| OTU_203 | Ascomycota        | Sordariomycetes     | Hypocreales       | Clavicipitaceae                      | Metapochonia    | Metapochonia_goniodes      |      | TRUE |
| OTU_204 | Ascomycota        | Dothideomycetes     | Pleosporales      | unidentified                         | unidentified    | unidentified               | TRUE |      |
| OTU_205 | Basidiomycota     | Agaricomycetes      | Boletales         | Boletaceae                           | Xerocomellus    | Xerocomellus_porosporus    | TRUE |      |
| OTU_206 | Basidiomycota     | Exobasidiomycetes   | Entylomatales     | unidentified                         | unidentified    | unidentified               |      | TRUE |
| OTU_207 | Ascomycota        | Dothideomycetes     | Pleosporales      | Pleosporaceae                        | Alternaria      | Alternaria_infectoria      | TRUE |      |

|         |                   |                    |                     |                                 |                 |                                   |      |      |
|---------|-------------------|--------------------|---------------------|---------------------------------|-----------------|-----------------------------------|------|------|
| OTU_208 | Ascomycota        | Eurotiomycetes     | Eurotiales          | Aspergillaceae                  | Penicillium     | Penicillium_sumatraense           | TRUE |      |
| OTU_209 | Basidiomycota     | Agaricomycetes     | unidentified        | unidentified                    | unidentified    | unidentified                      |      | TRUE |
| OTU_210 | Mortierellomycota | Mortierellomycetes | Mortierellales      | Mortierellaceae                 | Mortierella     | unidentified                      |      | TRUE |
| OTU_211 | Basidiomycota     | Agaricomycetes     | Corticiales         | Corticaceae                     | Corticium       | Corticium_confine                 | TRUE |      |
| OTU_214 | Basidiomycota     | Agaricomycetes     | Hymenochaetales     | unidentified                    | unidentified    | unidentified                      | TRUE |      |
| OTU_216 | Basidiomycota     | Tremellomycetes    | Tremellales         | Naemateliaceae                  | Dimennazyma     | Dimennazyma_cistialbidi           | TRUE |      |
| OTU_217 | Basidiomycota     | Tremellomycetes    | Tremellales         | Bulleraceae                     | Genolevuria     | Genolevuria_amylyolytica          |      | TRUE |
| OTU_218 | Ascomycota        | Dothideomycetes    | Pleosporales        | Pleosporales_fam_Incertae_sedis | Pseudodidymella | Pseudodidymella_minima            | TRUE | TRUE |
| OTU_219 | Ascomycota        | Leotiomycetes      | Helotiales          | unidentified                    | unidentified    | unidentified                      | TRUE |      |
| OTU_221 | Basidiomycota     | Tremellomycetes    | Tremellales         | Tremellaceae                    | Cryptococcus    | unidentified                      | TRUE |      |
| OTU_222 | Ascomycota        | Leotiomycetes      | Helotiales          | unidentified                    | unidentified    | unidentified                      |      | TRUE |
| OTU_223 | Basidiomycota     | Agaricomycetes     | Boletales           | Serpulaceae                     | Serpula         | Serpula_himantoides               |      | TRUE |
| OTU_224 | NA                | NA                 | NA                  | NA                              | NA              | No blast hit                      | TRUE |      |
| OTU_227 | Basidiomycota     | Agaricomycetes     | Agaricales          | Cortinariaceae                  | Cortinarius     | Cortinarius_anthracinus           |      | TRUE |
| OTU_228 | Rozellomycota     | unidentified       | unidentified        | unidentified                    | unidentified    | unidentified                      |      | TRUE |
| OTU_229 | Basidiomycota     | Tremellomycetes    | Tremellales         | Tremellaceae                    | Tremella        | unidentified                      | TRUE |      |
| OTU_230 | Basidiomycota     | Tremellomycetes    | Filobasidiales      | Filobasidiaceae                 | Filobasidium    | Filobasidium_floriforme           | TRUE |      |
| OTU_231 | Ascomycota        | Saccharomycetes    | Saccharomycetales   | Phaffomycetaceae                | Cyberlindnera   | Cyberlindnera_jadinii             |      | TRUE |
| OTU_232 | Basidiomycota     | Tremellomycetes    | Cystofilobasidiales | Mrakiaceae                      | Mrakia          | Mrakia_bollopis                   |      | TRUE |
| OTU_234 | unidentified      | unidentified       | unidentified        | unidentified                    | unidentified    | unidentified                      |      | TRUE |
| OTU_235 | Ascomycota        | Dothideomycetes    | Capnodiales         | unidentified                    | unidentified    | unidentified                      | TRUE | TRUE |
| OTU_237 | Ascomycota        | Dothideomycetes    | Capnodiales         | Mycosphaerellaceae              | Phaeophleospora | Phaeophleospora_hymenocallidicola | TRUE |      |
| OTU_238 | Ascomycota        | Sordariomycetes    | Hypocreales         | Nectriaceae                     | Neonectria      | Neonectria_lugdunensis            | TRUE |      |
| OTU_239 | Basidiomycota     | Tremellomycetes    | Tremellales         | Tremellaceae                    | Cryptococcus    | unidentified                      |      | TRUE |
| OTU_240 | Ascomycota        | Sordariomycetes    | Hypocreales         | Hypocreaceae                    | Trichoderma     | Trichoderma_lacuwombatense        | TRUE |      |
| OTU_241 | Ascomycota        | Saccharomycetes    | Saccharomycetales   | unidentified                    | unidentified    | unidentified                      | TRUE |      |
| OTU_243 | Ascomycota        | Eurotiomycetes     | Verrucariales       | Verrucariaceae                  | Atla            | Atla_vitikainenii                 | TRUE |      |
| OTU_244 | Basidiomycota     | Agaricomycetes     | Russulales          | Russulaceae                     | Russula         | Russula_cyanoxantha               |      | TRUE |
| OTU_245 | NA                | NA                 | NA                  | NA                              | NA              | No blast hit                      | TRUE | TRUE |



|         |               |                     |                                            |                   |               |                            |      |      |
|---------|---------------|---------------------|--------------------------------------------|-------------------|---------------|----------------------------|------|------|
| OTU_246 | Ascomycota    | Sordariomycetes     | Coniochaetales                             | Coniochaetaceae   | Coniochaeta   | Coniochaeta_acaciae        |      | TRUE |
| OTU_247 | Ascomycota    | Eurotiomycetes      | Eurotiales                                 | Aspergillaceae    | Aspergillus   | Aspergillus_penicillioides |      | TRUE |
| OTU_248 | Ascomycota    | Dothideomycetes     | unidentified                               | unidentified      | unidentified  | unidentified               |      | TRUE |
| OTU_249 | NA            | NA                  | NA                                         | NA                | NA            | No blast hit               | TRUE |      |
| OTU_250 | NA            | NA                  | NA                                         | NA                | NA            | No blast hit               | TRUE |      |
| OTU_251 | Basidiomycota | Malasseziomycetes   | Malasseziales                              | Malasseziaceae    | Malassezia    | Malassezia_globosa         | TRUE |      |
| OTU_252 | Basidiomycota | Cystobasidiomycetes | Cystobasidiomycetes_ord<br>_Incertae_sedis | Symmetrosporaceae | Symmetrospora | Symmetrospora_vermiculata  | TRUE |      |
| OTU_253 | Ascomycota    | Pezizomycetes       | Pezizales                                  | Pezizaceae        | Peziza        | Peziza_varia               | TRUE | TRUE |
| OTU_254 | NA            | NA                  | NA                                         | NA                | NA            | No blast hit               | TRUE |      |
| OTU_255 | NA            | NA                  | NA                                         | NA                | NA            | No blast hit               | TRUE |      |
| OTU_256 | NA            | NA                  | NA                                         | NA                | NA            | No blast hit               | TRUE |      |

---
