# Supplementary material for: Foliar Fungal Endophytes in a Tree Diversity Experiment Are Driven by the Identity but Not the Diversity of Tree Species
Source: MDPI journal article supplement (doi:10.3390/life11101081), 2021-10-13
Supplement: s1 [file s1]

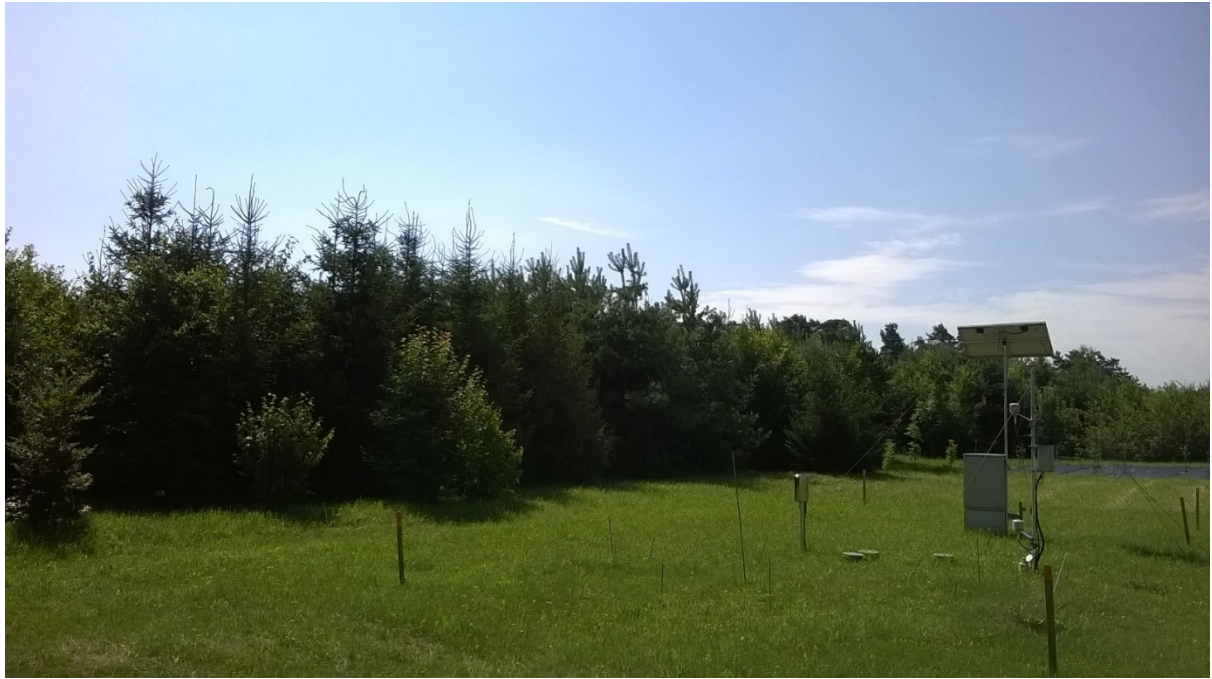

**Figure S1.** Photo of the densely vegetated plots at the Kreinitz tree diversity experiment in 2016 (This study was conducted one year later, in 2017).
