# Supplementary material for: Foliar Fungal Endophytes in a Tree Diversity Experiment Are Driven by the Identity but Not the Diversity of Tree Species
Source: Life (Basel). 2021 Oct 13;11(10):1081. doi: 10.3390/life11101081 (PMC8539603; doi:10.3390/life11101081)
Supplement: Supplementary file 1 [file life-11-01081-s001.zip]

Archive with 4 entries (4 files):
- Data S1.txt
- Figure S1.pdf
- Table S1.xlsx
- Table S2.pdf
