# Supplementary material for: Foliar Fungal Endophytes in a Tree Diversity Experiment Are Driven by the Identity but Not the Diversity of Tree Species
Source: Life (Basel). 2021 Oct 13;11(10):1081. doi: 10.3390/life11101081 (PMC8539603; doi:10.3390/life11101081)
Supplement: Supplementary file 1 [file life-11-01081-s001.zip › Data S1.txt]

sample	plot	focal_tree_species	tree_richness	tree_composition	OTU_001	OTU_002	OTU_005	OTU_006	OTU_007	OTU_008	OTU_010	OTU_011	OTU_013	OTU_014	OTU_015	OTU_016	OTU_017	OTU_018	OTU_019	OTU_020	OTU_021	OTU_022	OTU_023	OTU_024	OTU_025	OTU_026	OTU_027	OTU_028	OTU_029	OTU_030	OTU_031	OTU_032	OTU_033	OTU_034	OTU_035	OTU_036	OTU_037	OTU_038	OTU_039	OTU_040	OTU_041	OTU_042	OTU_043	OTU_044	OTU_046	OTU_047	OTU_048	OTU_049	OTU_050
KAI.090.Bu	A1	Beech	2	mixed	10282	733	2947	0	0	0	0	0	612	0	968	0	0	0	5951	710	0	701	0	0	408	0	0	0	0	0	0	0	0	953	0	0	0	0	0	0	0	0	0	0	0	0	0	0	0
KAI.131.Fi	A2	Spruce	2	evergreen	14858	0	0	0	0	0	0	0	0	15985	0	0	0	0	0	0	0	0	0	0	0	0	0	0	5554	0	0	0	0	0	0	0	0	0	0	0	0	0	0	0	0	0	0	0	0
KAI.057.Bu	A3	Beech	5	mixed	8180	0	0	0	0	0	0	0	0	0	0	0	0	0	0	0	0	0	0	0	0	0	0	0	0	0	0	0	0	0	0	0	0	0	0	0	0	0	0	0	0	0	0	0	0
KAI.134.Fi	A3	Spruce	5	mixed	2113	4323	0	3283	0	2105	0	0	442	0	1173	0	0	0	0	0	0	3016	0	0	0	0	0	0	0	0	0	0	0	3166	0	0	0	0	0	0	0	1526	0	0	0	0	0	0	0
KAI.139.Ei	A3	Oak	5	mixed	1621	0	0	0	547	6400	0	0	0	0	0	0	0	0	1492	0	0	0	0	0	0	0	0	1124	0	8098	0	0	0	0	0	0	0	0	0	0	0	0	0	0	0	0	0	0	0
KAI.075.Ei	A5	Oak	2	deciduous	0	0	0	0	0	0	696	0	0	0	0	0	0	0	0	944	0	0	0	0	0	0	0	0	0	0	0	0	0	0	0	0	0	0	0	0	0	0	0	0	0	0	0	0	0
KAI.054.Ei	A6	Oak	3	deciduous	20485	1349	1813	0	0	0	1060	0	646	126	988	0	0	316	0	0	0	0	0	0	0	0	2274	0	0	0	0	0	561	0	3	0	0	0	0	0	0	0	210	0	0	0	0	0	0
KAI.002.Bu	A7	Beech	5	mixed	3148	0	1278	1190	0	0	7338	0	2566	0	1829	0	0	0	0	2384	0	0	0	0	0	0	0	0	0	0	0	0	0	0	0	0	0	0	0	0	0	0	0	0	0	0	0	0	0
KAI.107.Fi	A7	Spruce	5	mixed	3108	1142	0	0	0	0	608	0	0	0	0	0	0	0	0	0	0	0	0	0	0	0	0	0	91	0	0	0	0	0	0	0	0	0	0	0	0	0	0	0	0	0	0	0	0
KAI.033.Bu	A8	Beech	3	mixed	2357	0	0	0	0	1327	0	0	1475	891	355	0	0	0	0	0	0	0	0	0	0	0	0	0	0	0	0	0	0	0	0	0	0	0	0	0	0	0	0	0	0	0	0	0	0
KAI.129.Ei	A8	Oak	3	mixed	0	0	4073	0	17321	0	7531	0	0	821	0	0	0	0	0	0	0	0	0	0	0	0	0	0	0	0	0	0	0	0	0	0	0	0	0	0	0	0	0	0	0	0	0	0	0
KAI.066.Ei	A9	Oak	3	mixed	8505	10108	1616	0	2020	0	0	2419	0	0	935	0	0	0	0	0	0	0	0	0	0	0	0	0	0	0	1798	0	0	0	0	0	0	0	0	0	0	0	261	0	0	1829	0	0	0
KAI.082.Fi	A10	Spruce	2	mixed	21279	0	421	2456	0	3048	0	73	105	0	939	1156	2609	1469	2176	0	0	0	0	0	6	0	3342	0	12	0	1397	0	0	0	0	0	0	0	0	0	0	0	26	0	0	0	0	0	0
KAI.133.Fi	A10	Spruce	2	mixed	23776	0	0	4565	0	0	0	0	0	0	0	20	0	0	0	0	0	0	0	14406	0	0	0	0	0	0	0	0	0	0	0	0	4037	0	0	0	0	0	0	0	0	0	0	0	0
KAI.073.Bu	A11	Beech	6	mixed	6989	0	0	0	0	0	0	0	0	0	0	9694	0	0	0	0	1790	0	0	0	0	0	0	0	0	0	0	0	0	0	0	0	0	0	0	0	0	0	0	0	0	0	0	0	0
KAI.076.Fi	A11	Spruce	6	mixed	5845	4	0	1548	0	1328	0	0	0	0	0	859	539	0	0	0	0	0	0	0	7	0	0	0	0	0	0	0	0	0	0	0	0	0	0	0	0	0	0	0	0	0	0	0	0
KAI.137.Ei	A11	Oak	6	mixed	1556	0	0	0	354	0	0	1713	0	0	0	0	0	0	0	0	0	0	0	0	0	0	0	0	0	0	0	447	0	0	0	0	0	0	0	0	0	0	0	0	1900	0	0	0	0
KAI.064.Ei	A12	Oak	1	deciduous	15243	3242	0	2896	0	0	0	0	0	0	865	0	0	0	0	0	0	0	0	0	0	0	0	0	0	0	0	0	0	0	0	0	0	0	0	0	0	0	0	0	0	0	0	0	0
KAI.067.Ei	A12	Oak	1	deciduous	604	6437	0	0	6500	0	0	0	252	0	0	0	1732	0	0	0	0	0	0	0	0	0	0	0	0	0	0	0	0	0	0	0	1721	0	0	0	0	0	0	0	0	0	0	0	0
KAI.043.Fi	A15	Spruce	3	mixed	2454	8446	0	712	0	0	0	0	0	0	0	924	0	0	0	569	0	0	0	0	0	0	0	0	0	0	0	0	0	0	0	0	2743	0	0	0	0	0	0	0	0	0	0	0	0
KAI.017.Ei	A17	Oak	5	mixed	0	0	0	0	4561	0	0	0	0	0	0	0	0	0	0	0	0	0	0	0	0	0	0	0	0	0	0	0	0	0	0	0	0	0	0	0	0	0	0	0	0	0	0	0	0
KAI.135.Fi	A17	Spruce	5	mixed	10536	0	0	1484	0	0	0	0	2325	0	0	0	0	0	0	0	0	0	0	0	0	0	0	0	0	0	0	0	0	0	0	0	0	0	0	0	0	0	0	0	0	0	0	0	0
KAI.115.Fi	A19	Spruce	2	mixed	7255	3749	1877	557	0	1044	0	0	0	0	448	0	0	1630	0	0	0	0	0	0	316	0	0	0	0	0	0	0	0	0	0	0	0	146	0	0	0	0	0	0	0	0	0	0	0
KAI.004.Bu	A20	Beech	2	deciduous	116	440	0	27	0	0	438	0	0	0	0	0	0	0	0	0	0	0	0	0	0	0	0	0	0	0	0	0	0	0	0	0	0	0	0	0	0	0	0	0	0	0	0	0	0
KAI.110.Ei	A20	Oak	2	deciduous	0	0	0	0	5222	0	446	0	0	0	0	0	0	0	0	0	0	0	0	0	0	0	0	0	0	0	0	0	0	0	0	0	0	0	0	0	0	0	0	0	0	0	0	0	0
KAI.024.Fi	A21	Spruce	1	evergreen	3488	8976	0	0	0	0	0	1492	781	0	0	0	0	0	0	0	0	0	0	0	0	0	0	0	1341	0	0	0	0	0	0	0	0	0	0	344	0	0	0	0	0	0	0	0	0
KAI.106.Fi	A21	Spruce	1	evergreen	1138	877	1117	0	0	0	0	0	0	277	0	0	2901	0	0	0	0	1188	0	0	210	0	0	0	0	0	0	0	0	0	1269	0	0	0	0	0	0	529	0	0	0	0	0	0	0
KAI.013.Fi	A22	Spruce	2	mixed	0	0	0	0	0	0	0	0	0	966	0	0	0	0	0	113	0	0	0	0	0	0	0	0	0	0	0	0	0	0	0	0	0	0	0	0	0	0	0	0	0	0	0	0	0
KAI.019.Ei	A22	Oak	2	mixed	8297	7918	3722	0	1285	0	0	0	762	0	0	0	0	0	0	0	0	0	0	0	1311	0	0	0	0	0	0	0	608	0	0	0	0	0	0	0	0	0	0	0	0	263	0	0	0
KAI.126.Ei	A23	Oak	2	deciduous	2716	1376	288	1035	486	452	0	0	0	0	26	88	0	0	166	0	0	56	0	0	86	0	0	0	0	0	0	0	0	383	122	241	0	0	0	0	0	0	393	0	0	0	0	0	0
KAI.038.Bu	A24	Beech	3	mixed	8284	0	0	0	0	0	146	0	0	0	0	0	0	0	0	0	0	0	0	0	0	0	0	0	0	0	0	0	0	0	0	0	0	0	0	0	0	0	0	0	0	0	0	0	0
KAI.068.Fi	A24	Spruce	3	mixed	2001	3031	0	83	0	2228	0	0	1745	0	0	0	0	0	0	0	0	1483	0	0	0	0	0	0	0	0	0	0	0	0	0	0	0	0	0	0	0	0	0	0	0	0	0	0	0
KAI.018.Ei	A25	Oak	3	mixed	277	0	0	181	0	362	0	0	0	0	388	0	425	0	0	89	0	37	0	0	0	0	0	0	0	0	0	0	0	0	0	0	0	134	532	0	0	0	0	97	0	0	0	0	0
KAI.077.Fi	A25	Spruce	3	mixed	2934	2254	607	1460	1	2	0	0	0	0	449	0	0	0	0	210	0	0	0	0	0	317	0	0	0	0	0	0	0	0	0	1426	0	0	0	0	0	0	0	0	0	254	0	0	0
KAI.141.Ei	A26	Oak	3	mixed	9869	0	0	0	0	0	0	0	0	0	0	0	0	0	0	0	0	0	0	0	0	0	0	0	0	0	0	0	0	3157	0	0	0	0	0	0	0	0	0	0	0	0	0	0	0
KAI.023.Bu	A27	Beech	1	deciduous	0	0	0	0	0	0	1240	0	0	0	0	0	0	0	0	0	0	0	0	0	0	0	0	0	0	0	0	0	0	0	0	0	0	0	0	0	0	0	0	0	0	0	0	0	0
KAI.128.Bu	A27	Beech	1	deciduous	0	0	0	0	0	0	0	0	3332	0	0	0	0	0	0	0	0	0	0	0	0	0	0	0	0	0	0	0	715	0	0	0	0	0	0	0	0	0	477	0	0	0	0	0	0
KAI.011.Ei	A28	Oak	3	mixed	5764	8397	1941	607	0	0	1780	0	0	0	0	0	0	0	0	967	0	0	0	0	0	0	0	0	0	0	0	0	0	0	0	0	0	0	0	856	0	0	0	0	0	674	0	0	0
KAI.035.Fi	A28	Spruce	3	mixed	2439	5521	0	0	0	0	0	0	0	0	0	0	0	0	0	0	0	0	0	0	0	0	0	0	0	0	0	0	0	0	0	0	0	0	0	0	0	0	0	0	0	0	0	0	0
KAI.007.Fi	A29	Spruce	3	mixed	3435	0	0	0	0	0	0	0	0	0	0	913	0	504	1125	0	0	2052	0	0	1025	0	0	0	0	0	0	0	0	0	0	0	0	0	0	0	0	1727	0	0	0	0	0	0	0
KAI.008.Ei	A29	Oak	3	mixed	0	0	0	0	21924	0	0	8674	0	0	0	0	0	0	0	0	0	0	0	0	0	0	0	0	0	0	0	0	0	0	0	0	0	0	0	0	0	0	0	0	0	0	0	0	0
KAI.079.Bu	A30	Beech	3	deciduous	1593	1244	0	3075	0	0	47	0	717	0	475	0	0	0	765	0	0	0	0	0	0	0	0	0	0	0	0	0	0	0	0	0	0	0	0	0	0	0	0	0	0	0	0	0	0
KAI.124.Ei	A30	Oak	3	deciduous	6259	3186	1	578	2666	0	372	546	100	0	437	0	0	0	0	0	0	0	0	0	13	205	0	0	0	0	0	0	0	0	0	0	0	0	0	0	0	0	0	0	0	0	0	0	0
KAI.099.Bu	A31	Beech	3	deciduous	9170	4468	4393	1769	0	667	0	277	401	0	359	0	0	0	341	242	0	293	0	0	74	0	0	0	0	0	9	0	0	0	0	0	0	48	0	0	82	0	0	0	0	0	0	0	0
KAI.111.Ei	A31	Oak	3	deciduous	0	0	0	2789	768	0	0	0	0	0	0	0	0	0	0	0	0	0	0	0	0	0	0	0	1103	0	0	0	0	0	0	0	0	0	0	0	0	0	0	0	0	0	0	0	0
KAI.112.Bu	A32	Beech	2	deciduous	7652	0	0	0	0	0	0	0	0	0	2245	0	0	4642	0	0	0	0	0	0	0	0	0	0	0	0	0	0	0	0	0	0	0	0	0	0	0	0	0	0	0	0	0	0	0
KAI.062.Ei	A33	Oak	2	mixed	9665	2274	536	422	215	323	0	0	57	0	122	0	361	0	0	73	0	0	0	0	114	30	0	0	0	0	0	0	0	0	0	0	0	0	0	0	131	0	0	0	0	0	0	0	0
KAI.093.Bu	A34	Beech	3	mixed	7252	3933	2107	1977	0	375	292	0	1032	0	457	300	0	193	747	72	70	0	0	0	229	0	0	0	0	0	45	0	327	0	0	0	0	0	0	0	0	0	0	0	0	0	0	0	0
KAI.109.Fi	A34	Spruce	3	mixed	4584	1775	2001	2279	0	0	601	0	0	0	0	0	0	0	0	399	0	0	0	0	536	0	0	0	0	0	0	0	0	0	0	0	0	0	0	0	0	0	0	0	0	0	0	0	0
KAI.092.Fi	A35	Spruce	3	mixed	1331	1767	1443	732	117	300	0	0	0	0	0	0	231	0	0	361	0	1	0	0	89	679	0	0	0	0	54	0	20	0	0	0	0	0	132	0	0	0	169	302	0	0	0	0	0
KAI.070.Fi	A37	Spruce	3	mixed	3346	4529	0	585	0	1766	0	910	0	0	0	501	0	0	0	0	0	0	0	0	0	1029	0	0	0	0	0	0	0	0	0	0	0	0	0	0	0	0	0	0	0	0	0	0	0
KAI.089.Bu	A38	Beech	3	deciduous	1743	0	0	0	0	0	0	0	0	0	0	0	0	0	0	0	0	0	0	0	0	0	0	4476	927	0	0	0	0	0	0	0	0	0	0	0	0	0	0	0	0	0	0	0	4061
KAI.012.Bu	A39	Beech	2	deciduous	0	3577	0	73	0	720	0	0	0	0	85	3	87	0	0	125	0	2	0	0	29	0	0	0	0	0	0	0	0	0	0	0	0	649	0	0	312	0	0	0	0	134	0	0	0
KAI.029.Bu	A40	Beech	5	mixed	3733	0	0	0	0	0	748	0	0	0	0	0	0	0	0	0	0	0	0	0	0	0	0	0	0	0	0	0	0	0	0	0	0	0	0	0	0	0	0	0	0	0	0	0	0
KAI.136.Ei	A40	Oak	5	mixed	7424	0	12029	0	8965	1220	797	0	0	0	0	0	0	0	0	0	0	0	0	0	0	0	0	0	1	0	0	0	0	0	1	0	0	1674	0	0	0	0	0	0	0	0	0	0	0
KAI.005.Bu	A42	Beech	3	mixed	0	3940	0	0	0	0	0	0	0	0	0	0	0	0	0	0	0	0	0	0	1	0	0	0	0	0	0	0	0	0	0	0	0	0	0	0	0	95	0	0	0	0	0	0	0
KAI.028.Bu	A43	Beech	5	mixed	2295	6030	805	0	0	0	0	0	0	0	0	0	0	0	0	0	0	0	0	0	0	0	0	0	0	0	0	0	0	0	0	0	0	0	0	0	0	0	0	0	0	0	0	0	0
KAI.031.Fi	A43	Spruce	5	mixed	1937	320	238	516	9	292	0	0	0	11	23	61	146	64	308	89	0	93	0	0	64	0	0	0	0	0	76	0	129	0	0	0	86	0	123	0	0	0	0	0	0	0	0	0	0
KAI.138.Ei	A43	Oak	5	mixed	6504	0	0	0	0	0	0	0	0	0	0	0	1	0	0	0	0	0	0	0	0	0	0	0	0	0	0	0	0	0	0	0	0	0	0	0	0	0	0	0	0	0	4055	0	0
KAI.058.Ei	A44	Oak	5	mixed	22276	0	0	1974	0	0	0	0	0	0	1	0	0	0	0	0	0	0	0	0	0	1759	0	0	0	0	554	0	0	0	1808	0	0	0	0	0	0	0	0	0	0	0	0	0	0
KAI.071.Bu	A44	Beech	5	mixed	0	0	0	876	0	0	0	0	0	0	0	0	0	0	0	1171	0	0	0	0	0	0	0	0	0	0	0	53	0	0	0	0	0	0	0	0	742	0	0	0	0	0	0	0	510
KAI.140.Fi	A44	Spruce	5	mixed	5487	0	0	0	0	0	0	0	0	0	0	0	0	341	0	334	0	0	0	0	0	0	0	0	0	0	0	0	0	0	0	0	0	0	0	0	0	0	0	0	0	0	0	0	0
KAI.045.Fi	A45	Spruce	3	mixed	848	0	0	0	0	0	0	0	0	0	0	0	0	0	0	0	0	0	0	0	0	0	0	0	0	0	0	0	0	0	0	0	0	0	0	0	0	0	0	0	0	0	0	0	0
KAI.053.Bu	A45	Beech	3	mixed	6953	0	0	0	0	0	0	0	0	0	0	0	0	0	0	0	0	0	0	0	0	0	0	0	0	0	0	0	0	0	0	0	0	0	0	0	0	0	0	0	0	0	0	0	0
KAI.030.Fi	A46	Spruce	2	mixed	3722	0	1473	0	0	0	0	0	0	0	0	0	0	0	0	0	0	0	0	0	0	0	2174	0	0	0	0	0	0	0	0	0	0	0	0	0	0	0	0	0	0	0	0	0	0
KAI.087.Bu	A46	Beech	2	mixed	5985	3264	1345	2647	0	4561	454	0	0	0	792	0	1360	528	1082	714	0	0	0	0	516	0	0	0	556	0	0	0	0	0	0	0	0	0	0	0	0	0	0	0	0	0	0	0	0
KAI.020.Bu	A48	Beech	3	mixed	716	3889	0	420	0	0	0	0	0	0	541	0	2	0	0	0	0	0	0	0	871	0	0	0	1	0	920	0	0	0	0	0	1	1	0	0	0	50	0	0	0	0	0	0	0
KAI.119.Ei	A48	Oak	3	mixed	8230	2733	1636	917	681	0	0	0	220	210	177	0	2267	1	0	0	0	0	0	0	32	0	0	0	0	0	180	0	0	0	0	0	0	0	0	0	0	0	0	2556	0	0	0	0	0
KAI.015.Bu	A49	Beech	3	mixed	652	2078	0	850	0	0	722	0	0	0	0	0	0	0	0	0	0	0	0	0	1167	0	0	0	0	0	0	0	0	0	0	0	0	0	0	96	0	0	0	0	0	0	0	0	0
KAI.061.Fi	B1	Spruce	2	evergreen	9797	0	0	254	0	0	0	0	0	0	0	0	0	0	0	0	0	0	0	0	0	0	0	0	837	0	0	0	0	0	2190	0	0	0	0	0	0	0	0	0	0	0	0	0	0
KAI.097.Fi	B2	Spruce	2	mixed	7342	0	0	0	0	0	0	0	0	0	0	2407	0	0	0	0	0	0	0	0	0	0	0	0	0	0	0	0	0	0	0	0	0	0	0	0	1729	0	0	0	0	0	0	0	0
KAI.088.Fi	B3	Spruce	2	mixed	15850	0	0	1160	0	0	0	0	0	0	0	0	0	0	0	0	0	0	0	0	0	0	0	0	0	0	0	0	0	0	0	0	0	0	0	0	0	0	0	0	0	0	0	3064	0
KAI.108.Bu	B3	Beech	2	mixed	2530	462	0	0	0	0	0	0	0	73	1	0	0	0	0	0	0	0	0	0	142	0	0	0	0	0	269	0	464	0	0	0	0	499	0	0	0	0	0	0	0	0	0	0	0
KAI.022.Bu	B4	Beech	5	mixed	1532	8440	637	0	0	0	0	0	0	0	0	0	0	0	0	0	0	0	0	0	135	0	0	0	0	0	0	0	0	0	0	0	0	0	0	0	0	0	0	0	0	0	0	0	0
KAI.050.Ei	B4	Oak	5	mixed	8837	0	0	0	6242	0	0	0	2494	0	0	0	0	3083	0	0	0	0	0	0	0	0	0	0	0	0	0	0	0	0	0	0	0	0	0	0	0	0	0	0	0	0	0	0	0
KAI.104.Fi	B4	Spruce	5	mixed	0	0	0	0	0	0	0	0	0	0	0	2353	0	2003	0	0	0	0	0	0	0	0	0	0	0	0	0	0	0	0	0	0	0	1537	0	0	0	0	0	0	0	0	0	0	0
KAI.006.Ei	B5	Oak	1	deciduous	507	590	445	0	313	0	0	1518	0	0	0	0	0	0	0	0	0	139	0	0	0	0	0	0	73	0	0	0	0	0	0	0	0	0	0	0	0	1312	0	0	0	0	0	0	0
KAI.094.Ei	B5	Oak	1	deciduous	3673	1365	948	847	837	0	0	0	0	0	0	0	182	0	0	266	0	0	0	0	91	0	0	0	0	0	311	0	0	0	542	0	327	0	0	0	0	0	0	0	0	0	0	0	0
KAI.021.Bu	B6	Beech	2	deciduous	1454	0	0	0	0	0	0	0	0	0	0	0	0	0	0	0	41	0	0	0	0	453	0	0	0	0	0	0	0	0	0	0	0	629	0	0	0	0	0	0	0	0	0	0	0
KAI.125.Ei	B6	Oak	2	deciduous	3156	1481	1073	608	0	351	0	190	0	0	44	74	1	0	0	14	0	190	0	0	34	0	0	0	0	0	0	724	48	0	71	0	36	0	49	0	83	0	0	0	0	0	0	46	0
KAI.032.Bu	B7	Beech	6	mixed	0	0	1294	1562	0	0	0	0	0	0	0	2	0	0	0	0	0	3	0	0	1219	0	0	0	2	0	0	0	0	0	0	0	0	0	1	0	0	0	0	0	0	0	0	0	0
KAI.091.Fi	B7	Spruce	6	mixed	5729	9557	0	0	0	0	425	0	0	0	0	0	0	0	0	924	0	0	0	0	0	0	0	0	0	0	0	0	0	0	0	2836	0	0	0	0	0	0	0	0	0	0	0	0	0
KAI.116.Ei	B7	Oak	6	mixed	0	0	277	0	2318	0	1923	0	0	0	0	0	0	0	0	0	0	0	0	0	0	0	0	0	0	0	0	0	0	0	0	0	0	0	0	0	0	0	0	0	0	0	0	0	0
KAI.041.Ei	B8	Oak	3	mixed	0	0	0	0	5647	0	0	0	0	0	0	0	0	0	0	0	0	0	0	0	0	0	0	0	0	0	0	0	0	0	0	0	0	0	0	0	0	0	0	0	0	0	0	0	0
KAI.105.Bu	B8	Beech	3	mixed	13242	0	0	0	0	0	0	0	0	1089	0	0	0	0	0	213	19557	0	0	0	0	0	0	0	1121	0	0	634	0	0	0	0	0	0	0	0	0	0	0	0	0	0	0	0	0
KAI.048.Bu	B11	Beech	5	mixed	4	0	0	0	0	0	0	0	0	0	0	0	339	0	0	0	0	0	0	0	0	0	0	0	0	0	0	0	0	0	0	0	0	0	1	0	0	0	0	0	0	0	0	0	0
KAI.103.Ei	B11	Oak	5	mixed	10444	2627	1544	1022	0	646	0	0	389	0	1074	315	1152	183	460	88	0	529	0	0	86	0	0	0	0	0	0	863	0	0	0	0	0	752	617	0	0	0	0	0	0	0	0	0	0
KAI.037.Bu	B12	Beech	3	mixed	0	0	0	0	0	0	0	0	0	0	0	0	0	0	0	0	0	0	0	0	0	0	0	0	0	0	0	0	0	0	0	0	0	0	0	0	0	0	0	0	0	0	0	0	0
KAI.016.Bu	B13	Beech	3	mixed	1020	0	4490	2276	0	0	0	0	0	0	152	0	0	0	0	0	0	1840	0	0	0	0	0	0	1	0	0	0	0	0	0	0	0	0	1	5620	0	902	0	0	0	0	0	0	0
KAI.027.Fi	B13	Spruce	3	mixed	4581	1417	0	307	0	0	805	0	0	0	0	0	0	0	0	0	0	0	0	0	1805	0	0	0	0	0	2118	0	0	0	0	0	0	0	0	0	0	0	0	0	0	1510	0	0	0
KAI.086.Ei	B14	Oak	3	mixed	10031	3122	0	751	439	395	335	0	164	0	104	0	0	0	1171	161	0	180	0	0	4	0	0	0	0	0	0	0	0	0	1374	0	0	0	0	0	301	0	0	0	0	0	0	0	0
KAI.049.Fi	B15	Spruce	2	mixed	858	0	0	1837	0	0	0	0	0	0	0	17	0	0	0	0	0	0	0	0	0	0	0	0	0	0	0	0	0	0	0	0	0	0	0	0	518	0	0	0	0	0	0	0	0
KAI.098.Fi	B17	Spruce	2	mixed	2652	573	249	216	0	106	0	0	148	0	81	0	373	0	246	608	0	229	0	0	28	0	0	90	0	0	0	0	56	0	0	0	0	0	0	0	0	0	0	0	0	0	0	0	0
KAI.120.Ei	B17	Oak	2	mixed	0	0	14199	0	4355	0	0	0	3191	0	0	0	0	0	0	0	0	0	0	0	0	0	0	0	0	0	0	0	0	0	0	0	0	0	0	0	0	0	0	0	0	0	0	0	0
KAI.025.Ei	B18	Oak	5	mixed	0	0	2727	0	6044	0	0	0	0	0	0	0	0	0	0	0	0	0	0	0	0	0	0	0	0	0	0	0	0	0	0	0	0	0	0	0	0	0	0	0	0	0	0	0	0
KAI.074.Fi	B18	Spruce	5	mixed	1	4543	0	387	0	677	0	0	504	0	0	0	167	0	1483	0	0	0	0	0	371	0	0	0	0	0	0	0	0	0	0	0	0	0	0	0	0	0	0	0	0	0	0	0	0
KAI.101.Bu	B18	Beech	5	mixed	1904	0	577	0	0	0	0	0	0	226	0	35	980	397	2017	0	0	1032	0	0	0	0	0	0	0	0	0	0	752	0	0	0	0	0	0	0	0	259	0	0	0	0	0	0	0
KAI.001.Ei	B19	Oak	5	mixed	0	0	0	0	5931	0	0	0	0	0	0	0	0	0	0	0	0	0	0	0	0	0	0	0	0	0	0	0	0	0	0	0	0	0	0	0	0	0	0	0	0	0	0	0	0
KAI.003.Fi	B19	Spruce	5	mixed	6454	25927	0	0	0	4357	1983	0	0	0	2678	0	0	0	0	0	0	0	0	0	1345	0	0	0	0	0	0	0	0	0	0	0	0	0	0	0	0	0	0	0	0	0	0	0	0
KAI.072.Bu	B19	Beech	5	mixed	0	0	0	0	0	0	0	0	3867	0	0	0	0	0	0	0	0	0	0	0	0	0	0	0	0	0	0	0	0	0	0	0	0	0	0	0	0	0	0	0	0	0	0	0	0
KAI.096.Fi	B21	Spruce	3	mixed	0	0	0	0	0	0	0	0	0	0	2926	0	0	0	0	0	0	0	0	0	0	0	0	0	0	0	0	0	0	0	0	0	0	0	0	0	0	0	0	0	0	0	0	0	0
KAI.060.Ei	B22	Oak	3	mixed	0	0	0	0	2770	0	0	565	0	0	0	0	0	0	0	0	0	0	0	0	0	0	0	0	1280	0	0	0	0	0	0	0	0	0	0	0	0	0	0	0	0	0	0	131	0
KAI.118.Bu	B23	Beech	3	deciduous	3032	3231	552	208	0	660	0	0	0	0	248	0	351	499	0	0	0	0	0	0	0	0	0	0	0	0	0	0	355	0	0	0	0	0	0	0	0	0	0	0	0	0	0	0	0
KAI.084.Fi	B25	Spruce	3	mixed	4762	729	1648	836	0	1056	0	0	144	0	0	0	1028	404	0	0	0	1115	0	0	0	0	2051	0	0	0	0	0	0	0	0	0	0	795	578	0	710	0	0	0	0	0	0	0	0
KAI.127.Bu	B26	Beech	2	mixed	10045	6437	1881	1196	0	1138	0	0	0	0	761	369	0	0	0	189	0	0	0	0	0	46	1976	0	0	0	0	0	2121	0	0	0	0	0	0	0	1336	0	0	1978	0	0	0	0	0
KAI.065.Fi	B27	Spruce	3	mixed	0	13553	0	3155	0	0	0	0	0	0	1430	0	0	0	0	0	0	0	0	0	0	1272	0	0	0	0	0	0	1697	0	0	0	0	0	0	0	0	0	0	0	0	0	0	0	0
KAI.113.Ei	B27	Oak	3	mixed	12061	0	5642	0	0	0	0	4780	0	0	0	0	0	0	0	0	0	0	0	0	0	1896	0	0	0	0	0	0	0	0	0	2276	0	0	0	0	0	0	0	0	0	0	0	0	0
KAI.010.Fi	B29	Spruce	1	evergreen	1165	2641	0	0	0	0	0	0	0	0	0	0	0	0	0	0	0	0	14225	0	0	0	0	0	0	0	0	0	0	0	0	0	0	0	0	0	0	320	0	0	0	0	0	0	0
KAI.014.Fi	B29	Spruce	1	evergreen	1333	0	0	0	0	0	3123	0	0	0	0	0	0	0	0	0	0	0	0	0	0	0	0	0	0	0	0	0	0	0	0	0	0	0	0	0	0	0	0	0	0	0	0	0	0
KAI.052.Ei	B30	Oak	3	mixed	0	0	0	0	5016	0	0	0	0	0	0	0	0	0	0	0	0	0	0	0	0	0	0	0	0	0	0	0	0	0	0	0	0	0	0	0	0	0	0	0	0	0	0	0	0
KAI.059.Bu	B30	Beech	3	mixed	0	0	3913	0	0	0	0	0	0	0	0	0	0	2486	0	0	0	0	0	0	0	0	0	0	0	0	0	0	2230	0	0	0	0	0	0	0	0	0	0	0	0	0	0	0	0
KAI.034.Fi	B31	Spruce	3	mixed	6807	9126	1795	1326	0	0	0	910	0	0	0	0	0	0	0	0	0	0	0	0	0	0	0	0	0	0	0	0	0	0	0	0	0	0	0	0	0	0	0	0	0	0	0	0	0
KAI.039.Bu	B32	Beech	1	deciduous	2823	1001	0	93	0	1413	0	0	0	0	0	0	0	0	0	0	0	0	0	0	0	0	0	0	0	0	0	0	0	0	0	0	0	0	0	0	0	0	0	0	0	0	0	0	0
KAI.040.Bu	B32	Beech	1	deciduous	5909	0	0	0	0	0	0	0	0	0	0	1	1474	0	0	0	0	0	0	0	0	0	0	0	1	0	0	0	0	0	0	0	0	0	4	0	0	0	0	0	0	0	0	0	0
KAI.036.Fi	B34	Spruce	3	mixed	0	1865	1757	0	0	1438	0	0	0	0	0	0	0	0	0	0	0	0	0	0	82	0	0	0	0	0	0	0	0	0	0	0	0	0	1641	0	0	0	0	0	0	0	0	0	0
KAI.102.Ei	B34	Oak	3	mixed	15236	4597	0	1072	148	593	459	0	224	607	148	0	0	190	1677	236	0	252	0	0	4	0	0	0	0	0	0	0	0	0	1987	0	0	0	0	0	417	0	0	0	0	0	0	0	0
KAI.085.Ei	B35	Oak	2	deciduous	1319	0	0	0	3897	0	0	0	0	0	0	0	0	0	0	0	0	0	0	0	0	0	0	0	0	0	0	0	0	0	0	0	0	0	0	0	0	0	0	0	0	0	0	0	0
KAI.009.Bu	B36	Beech	2	deciduous	10563	1691	1544	581	0	6469	0	0	0	0	0	0	617	0	0	0	0	0	0	0	0	0	0	0	1583	0	0	0	0	0	0	0	0	0	0	0	0	122	0	0	0	0	0	0	0
KAI.117.Ei	B37	Oak	2	mixed	4347	2641	3269	305	1343	807	0	0	0	0	730	0	0	0	0	0	0	0	0	0	171	0	0	0	0	0	0	0	0	0	0	0	0	0	0	0	0	0	0	0	0	0	0	0	0
KAI.100.Fi	B38	Spruce	3	mixed	488	0	0	0	0	0	0	0	0	0	774	0	0	0	0	0	0	0	0	0	0	0	0	0	0	0	0	0	0	0	0	0	0	0	0	0	0	0	0	0	0	0	0	0	0
KAI.114.Ei	B38	Oak	3	mixed	0	0	0	2695	4142	0	0	0	0	0	0	473	0	0	0	0	0	0	0	0	0	1006	0	0	0	0	0	0	0	0	0	0	0	0	0	0	0	0	0	0	0	0	0	0	0
KAI.122.Bu	B38	Beech	3	mixed	1902	0	0	0	0	0	0	0	0	0	0	0	0	0	0	169	0	1	0	0	0	0	0	0	0	0	0	0	0	0	0	0	0	0	0	0	0	0	0	0	0	0	0	0	0
KAI.121.Ei	B41	Oak	5	mixed	2596	6091	0	1939	0	0	0	2929	0	0	0	0	0	0	0	1661	0	0	0	0	0	0	0	0	0	0	0	0	0	0	0	0	0	0	0	0	0	0	0	0	0	0	0	0	0
KAI.046.Bu	B42	Beech	3	deciduous	7763	2446	623	690	0	739	0	0	0	0	14	0	267	0	0	0	0	0	0	0	0	309	76	0	0	0	0	0	32	0	2467	0	0	0	882	0	211	0	3011	0	0	0	0	0	30
KAI.051.Ei	B42	Oak	3	deciduous	0	0	0	0	12938	0	0	0	0	0	0	0	0	0	0	0	0	0	0	0	0	0	0	0	0	0	0	133	0	0	0	0	0	0	0	0	0	0	0	0	0	0	0	0	0
KAI.130.Ei	B43	Oak	2	deciduous	0	0	0	0	0	0	0	0	0	0	0	0	0	0	0	0	0	0	0	0	0	0	0	0	0	0	0	0	0	0	0	0	0	0	0	0	0	0	0	0	0	0	0	0	0
KAI.055.Bu	B44	Beech	3	mixed	1147	618	1046	87	0	0	0	0	0	79	0	0	0	0	0	0	0	0	0	0	0	0	0	0	0	0	0	0	0	0	0	0	0	0	0	0	0	0	0	0	0	0	0	0	0
KAI.080.Fi	B44	Spruce	3	mixed	5822	0	0	0	0	0	0	0	0	0	0	0	1347	0	0	0	0	0	0	0	0	0	0	0	0	0	0	3575	0	0	0	0	0	0	0	0	0	0	0	0	0	0	0	0	0
KAI.044.Ei	B45	Oak	3	deciduous	876	2447	0	0	1435	0	0	97	102	0	0	0	0	0	0	0	0	0	0	0	512	0	0	0	0	0	0	0	0	0	0	0	0	0	0	0	0	0	0	0	0	155	0	0	0
KAI.123.Bu	B46	Beech	3	mixed	8697	0	0	0	0	0	0	0	0	0	0	0	0	0	0	0	0	0	0	0	0	0	0	0	0	0	0	0	0	0	0	0	0	0	0	0	0	0	0	0	2639	0	0	0	0
KAI.063.Fi	B48	Spruce	5	mixed	3196	1959	1021	0	0	231	3040	0	0	0	332	0	19651	0	0	0	0	2146	0	0	126	0	0	0	0	0	0	0	0	0	0	0	0	983	0	0	0	0	466	0	0	0	0	0	0
KAI.069.Bu	B48	Beech	5	mixed	641	0	0	0	0	0	0	0	0	0	0	0	0	0	0	0	0	0	0	0	0	0	0	0	0	0	0	0	0	0	0	0	0	0	0	0	0	0	0	0	0	0	0	0	0
KAI.026.Fi	B49	Spruce	3	mixed	4341	131	1508	606	0	0	0	0	0	16	186	0	0	0	68	446	0	0	0	0	0	0	0	0	0	0	0	0	0	0	0	0	0	0	0	0	0	0	187	0	0	0	0	0	0
KAI.056.Ei	B49	Oak	3	mixed	0	0	0	0	4945	0	0	0	0	0	0	0	0	5345	0	0	0	0	0	0	0	0	0	0	0	0	0	0	0	0	0	0	0	721	0	0	0	0	0	0	0	0	0	0	0
[truncated: 179 more columns]
