# Supplementary material for: Foliar Fungal Endophytes in a Tree Diversity Experiment Are Driven by the Identity but Not the Diversity of Tree Species
Source: Life (Basel). 2021 Oct 13;11(10):1081. doi: 10.3390/life11101081 (PMC8539603; doi:10.3390/life11101081)
Supplement: Supplementary file 1 [file life-11-01081-s001.zip › Table S1.xlsx]

## Sheet: Table S#
Table S1. Primer sequences and respective combinations. Oligonucleotide sequences used for amplification in the first (forward primers: ITS1F and reverse: ITS4) and second (forward: I5 and reverse: I7) PCR of the library preparation. Identifiers (i.e. TAG sequences) are highlighted in bold. The primers were combined as indicated.
F primer name	F primer sequence	R primer name	R primer sequence
ITS1F_1.1	TACACGACGCTCTTCCGATCTTCATCTTGGTCATTTAGAGGAAGTAA	ITS4_1.1	CAGACGTGTGCTCTTCCGATCTAGGAGTCCTCCGCTTATTGATATGC
ITS1F_1.2	TACACGACGCTCTTCCGATCTGACGCTTGGTCATTTAGAGGAAGTAA	ITS4_1.2	CAGACGTGTGCTCTTCCGATCTCTGCTTCCTCCGCTTATTGATATGC
ITS1F_1.3	TACACGACGCTCTTCCGATCTGCAGCTTGGTCATTTAGAGGAAGTAA	ITS4_1.3	CAGACGTGTGCTCTTCCGATCTCGTAGTCCTCCGCTTATTGATATGC
ITS1F_1.4	TACACGACGCTCTTCCGATCTTACTCTTGGTCATTTAGAGGAAGTAA	ITS4_1.4	CAGACGTGTGCTCTTCCGATCTAGTCTTCCTCCGCTTATTGATATGC
ITS1F_2.1	TACACGACGCTCTTCCGATCTAAGTGACTTGGTCATTTAGAGGAAGTAA	ITS4_2.1	CAGACGTGTGCTCTTCCGATCTCGCTCATCCTCCGCTTATTGATATGC
ITS1F_2.2	TACACGACGCTCTTCCGATCTCCGTGACTTGGTCATTTAGAGGAAGTAA	ITS4_2.2	CAGACGTGTGCTCTTCCGATCTATATCATCCTCCGCTTATTGATATGC
ITS1F_2.3	TACACGACGCTCTTCCGATCTCATGGCCTTGGTCATTTAGAGGAAGTAA	ITS4_2.3	CAGACGTGTGCTCTTCCGATCTCGAGACTCCTCCGCTTATTGATATGC
ITS1F_2.4	TACACGACGCTCTTCCGATCTAATGTACTTGGTCATTTAGAGGAAGTAA	ITS4_2.4	CAGACGTGTGCTCTTCCGATCTCTCGCCTCCTCCGCTTATTGATATGC
ITS1F_3.1	TACACGACGCTCTTCCGATCTTGCGAGACTTGGTCATTTAGAGGAAGTAA	ITS4_3.1	CAGACGTGTGCTCTTCCGATCTGCTAACATCCTCCGCTTATTGATATGC
ITS1F_3.2	TACACGACGCTCTTCCGATCTTTAGCGACTTGGTCATTTAGAGGAAGTAA	ITS4_3.2	CAGACGTGTGCTCTTCCGATCTTAGACACTCCTCCGCTTATTGATATGC
ITS1F_3.3	TACACGACGCTCTTCCGATCTGGATCGACTTGGTCATTTAGAGGAAGTAA	ITS4_3.3	CAGACGTGTGCTCTTCCGATCTGAGAACCTCCTCCGCTTATTGATATGC
ITS1F_3.4	TACACGACGCTCTTCCGATCTTGCTATCCTTGGTCATTTAGAGGAAGTAA	ITS4_3.4	CAGACGTGTGCTCTTCCGATCTGCTCCAATCCTCCGCTTATTGATATGC
ITS1F_4.1	TACACGACGCTCTTCCGATCTGACATCCACTTGGTCATTTAGAGGAAGTAA	ITS4_4.1	CAGACGTGTGCTCTTCCGATCTTTGACCAGTCCTCCGCTTATTGATATGC
ITS1F_4.2	TACACGACGCTCTTCCGATCTTCCAGCCACTTGGTCATTTAGAGGAAGTAA	ITS4_4.2	CAGACGTGTGCTCTTCCGATCTGGTACACTTCCTCCGCTTATTGATATGC
ITS1F_4.3	TACACGACGCTCTTCCGATCTGAACTACACTTGGTCATTTAGAGGAAGTAA	ITS4_4.3	CAGACGTGTGCTCTTCCGATCTTGGCACAGTCCTCCGCTTATTGATATGC
ITS1F_4.4	TACACGACGCTCTTCCGATCTGACAGAACCTTGGTCATTTAGAGGAAGTAA	ITS4_4.4	CAGACGTGTGCTCTTCCGATCTTTGCAACTTCCTCCGCTTATTGATATGC
I5_N501.1	AATGATACGGCGACCACCGAGATCTACACTAGATCGCACACTCTTTCCCTACACGACGCTCTTCCGATCT	I7_N701.1	CAAGCAGAAGACGGCATACGAGATTAAGGCGAGTGACTGGAGTTCAGACGTGTGCTCTTCCGATC
I5_N501.2	AATGATACGGCGACCACCGAGATCTACACGCTATCTCACACTCTTTCCCTACACGACGCTCTTCCGATCT	I7_N701.2	CAAGCAGAAGACGGCATACGAGATGCCTGCGAGTGACTGGAGTTCAGACGTGTGCTCTTCCGATC
I5_N501.3	AATGATACGGCGACCACCGAGATCTACACTATCGAGAACACTCTTTCCCTACACGACGCTCTTCCGATCT	I7_N701.3	CAAGCAGAAGACGGCATACGAGATTACTTAGAGTGACTGGAGTTCAGACGTGTGCTCTTCCGATC
I5_N501.4	AATGATACGGCGACCACCGAGATCTACACTAGCGCTAACACTCTTTCCCTACACGACGCTCTTCCGATCT	I7_N701.4	CAAGCAGAAGACGGCATACGAGATTAAGTATCGTGACTGGAGTTCAGACGTGTGCTCTTCCGATC
I5_N502.1	AATGATACGGCGACCACCGAGATCTACACCTCTCTATACACTCTTTCCCTACACGACGCTCTTCCGATCT	I7_N702.1	CAAGCAGAAGACGGCATACGAGATCGTACTAGGTGACTGGAGTTCAGACGTGTGCTCTTCCGATC
I5_N502.2	AATGATACGGCGACCACCGAGATCTACACAGAGCTATACACTCTTTCCCTACACGACGCTCTTCCGATCT	I7_N702.2	CAAGCAGAAGACGGCATACGAGATATGCCTAGGTGACTGGAGTTCAGACGTGTGCTCTTCCGATC
I5_N502.3	AATGATACGGCGACCACCGAGATCTACACCTAGAGATACACTCTTTCCCTACACGACGCTCTTCCGATCT	I7_N702.3	CAAGCAGAAGACGGCATACGAGATCGGCAGAGGTGACTGGAGTTCAGACGTGTGCTCTTCCGATC
I5_N505.1	AATGATACGGCGACCACCGAGATCTACACGTAAGGAGACACTCTTTCCCTACACGACGCTCTTCCGATCT	I7_N705.1	CAAGCAGAAGACGGCATACGAGATGGACTCCTGTGACTGGAGTTCAGACGTGTGCTCTTCCGATC
I5_N505.2	AATGATACGGCGACCACCGAGATCTACACTGCCGGAGACACTCTTTCCCTACACGACGCTCTTCCGATCT	I7_N705.2	CAAGCAGAAGACGGCATACGAGATTTCATCCTGTGACTGGAGTTCAGACGTGTGCTCTTCCGATC
I5_N505.3	AATGATACGGCGACCACCGAGATCTACACGTCCTTAGACACTCTTTCCCTACACGACGCTCTTCCGATCT	I7_N705.3	CAAGCAGAAGACGGCATACGAGATGGCAGACTGTGACTGGAGTTCAGACGTGTGCTCTTCCGATC
I5_N505.4	AATGATACGGCGACCACCGAGATCTACACGTAATTCTACACTCTTTCCCTACACGACGCTCTTCCGATCT	I7_N705.4	CAAGCAGAAGACGGCATACGAGATGGACGAAGGTGACTGGAGTTCAGACGTGTGCTCTTCCGATC
I5_N506.1	AATGATACGGCGACCACCGAGATCTACACACTGCATAACACTCTTTCCCTACACGACGCTCTTCCGATCT	I7_N706.1	CAAGCAGAAGACGGCATACGAGATTAGGCATGGTGACTGGAGTTCAGACGTGTGCTCTTCCGATC
I5_N506.2	AATGATACGGCGACCACCGAGATCTACACCAGTCATAACACTCTTTCCCTACACGACGCTCTTCCGATCT	I7_N706.2	CAAGCAGAAGACGGCATACGAGATGCTTCATGGTGACTGGAGTTCAGACGTGTGCTCTTCCGATC
I5_N506.3	AATGATACGGCGACCACCGAGATCTACACACGTACTAACACTCTTTCCCTACACGACGCTCTTCCGATCT	I7_N706.3	CAAGCAGAAGACGGCATACGAGATTACCGTTGGTGACTGGAGTTCAGACGTGTGCTCTTCCGATC
I5_N506.4	AATGATACGGCGACCACCGAGATCTACACACTGACGAACACTCTTTCCCTACACGACGCTCTTCCGATCT	I7_N706.4	CAAGCAGAAGACGGCATACGAGATTAGGACGTGTGACTGGAGTTCAGACGTGTGCTCTTCCGATC
I5_N507.1	AATGATACGGCGACCACCGAGATCTACACAAGGAGTAACACTCTTTCCCTACACGACGCTCTTCCGATCT	I7_N707.1	CAAGCAGAAGACGGCATACGAGATCTCTCTACGTGACTGGAGTTCAGACGTGTGCTCTTCCGATC
I5_N507.2	AATGATACGGCGACCACCGAGATCTACACCCTTAGTAACACTCTTTCCCTACACGACGCTCTTCCGATCT	I7_N707.2	CAAGCAGAAGACGGCATACGAGATAGAGCTACGTGACTGGAGTTCAGACGTGTGCTCTTCCGATC
I5_N507.3	AATGATACGGCGACCACCGAGATCTACACAATTCTGAACACTCTTTCCCTACACGACGCTCTTCCGATCT	I7_N707.3	CAAGCAGAAGACGGCATACGAGATCTAGAGACGTGACTGGAGTTCAGACGTGTGCTCTTCCGATC
I5_N507.4	AATGATACGGCGACCACCGAGATCTACACAAGGCTGCACACTCTTTCCCTACACGACGCTCTTCCGATCT	I7_N707.4	CAAGCAGAAGACGGCATACGAGATCTCTAGCAGTGACTGGAGTTCAGACGTGTGCTCTTCCGATC
I5_N508.1	AATGATACGGCGACCACCGAGATCTACACCTAAGCCTACACTCTTTCCCTACACGACGCTCTTCCGATCT	I7_N708.1	CAAGCAGAAGACGGCATACGAGATCAGAGAGGGTGACTGGAGTTCAGACGTGTGCTCTTCCGATC
I5_N508.2	AATGATACGGCGACCACCGAGATCTACACAGCCGCCTACACTCTTTCCCTACACGACGCTCTTCCGATCT	I7_N708.2	CAAGCAGAAGACGGCATACGAGATACTCGAGGGTGACTGGAGTTCAGACGTGTGCTCTTCCGATC
I5_N508.3	AATGATACGGCGACCACCGAGATCTACACCTCCTACTACACTCTTTCCCTACACGACGCTCTTCCGATCT	I7_N708.3	CAAGCAGAAGACGGCATACGAGATCATCTCGGGTGACTGGAGTTCAGACGTGTGCTCTTCCGATC
I5_N508.4	AATGATACGGCGACCACCGAGATCTACACCTAATAAGACACTCTTTCCCTACACGACGCTCTTCCGATCT	I7_N708.4	CAAGCAGAAGACGGCATACGAGATCAGATCTTGTGACTGGAGTTCAGACGTGTGCTCTTCCGATC
